# Supplementary material
Source: PubMed Central journal article supplement (PMC2658092)

## SUPPLEMENTAL DATA

### LEGENDS FOR S.D. FIGURES

S.D. FIGURE 1. **Double integration (area, S) of the normalized radical signal at  $g = 2.0049$  versus microwave power ( $P$ ) (in milliwatts).** EPR spectra have been recorded at 20 K;  $\nu$  9.387 GHz; modulation amplitude 0.2 mT; modulation frequency 100 kHz; and microwave power values 0.02, 0.2, 2, 20, 63, and 100 mW.

S.D. FIGURE 2. **Molecular structure of the tyrosyl radical with atom numbering.** The large outer numbers are the  $p_z$ -spin densities at the respective carbon and oxygen nuclei.

S.D. FIGURE 3. **EPR spectra of: A) W164S, B) W164H; and C) HRP** (recorded at 9 K, 20 K and 40 K).

S.D. FIGURE 4. **Kinetics of reduction of VPI and VPII of native VP and its directed variants by RB5.** Stopped-flow reactions were carried out at 25 °C using 1  $\mu$ M enzyme, 0.1 M tartrate (pH 3.5), and varying concentrations of RB5. The insets show kinetic curves at a smaller vertical scale. Means and 95% confidence limits of replicate assays are shown. The symbols are as follows: Native VP (●), W164Y (■), W164H (◆), W164S (▲), W164Y/R257A/A260F (□) and R257A/A260F (VPI reduction measured at 10°C, and 25°C estimation presented) (○).

S.D. FIGURE 5. **Revised VP catalytic cycle.** The scheme shows: **i)** Basic cycle involved in  $Mn^{2+}$  oxidation including two-electron oxidation of the resting peroxidase (VP, containing  $Fe^{3+}$ ) by hydroperoxide to yield  $VPI_A$  (containing  $Fe^{4+}$ -oxo and porphyrin cation radical), whose reduction in two one-electron steps results in the intermediate  $VPII_A$  (containing  $Fe^{4+}$ -oxo after porphyrin reduction) and then the resting form of the enzyme; and **ii)** Extended cycle including also  $VPI_B$  (containing  $Fe^{4+}$ -oxo and tryptophan radical) and  $VPII_B$  (containing  $Fe^{3+}$  and tryptophan radical) involved in oxidation of VA. Some low redox-potential phenols (like *p*-hydroquinone) and dyes (like ABTS) are probably oxidized by both the A and B forms, but they are not included for simplicity. Adapted from Pérez-Boada et al. (9).

**S.D. TABLE 1**

**Transient-state kinetics for formation of VPI ( $k_{1app}$ ) of native enzyme and site-directed variants by  $H_2O_2$ :**

Apparent second-order rate constants ( $M^{-1} \cdot s^{-1}$ ). Means and 95% confidence limits.

|                   | $k_{1app}$                    |
|-------------------|-------------------------------|
| VP                | $(3.46 \pm 0.07) \times 10^6$ |
| W164Y             | $(4.24 \pm 0.05) \times 10^6$ |
| W164H             | $(3.77 \pm 0.01) \times 10^6$ |
| W164S             | $(3.84 \pm 0.06) \times 10^6$ |
| W164Y/R257A/A260F | $(3.92 \pm 0.05) \times 10^6$ |
| R257A/A260F       | $(3.30 \pm 0.15) \times 10^6$ |

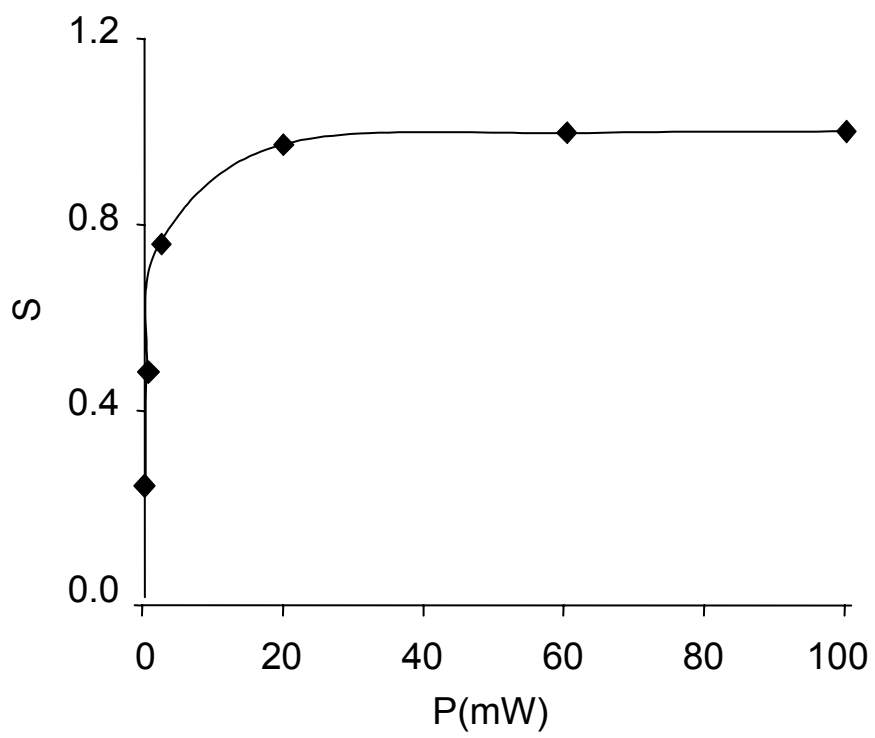

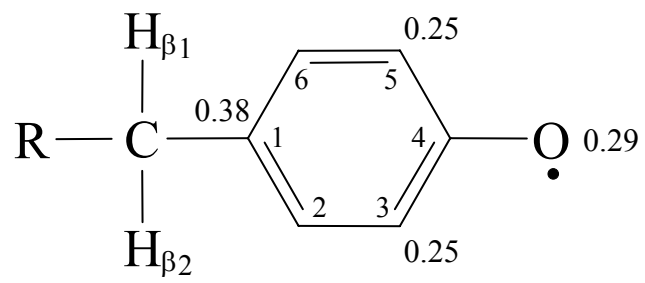

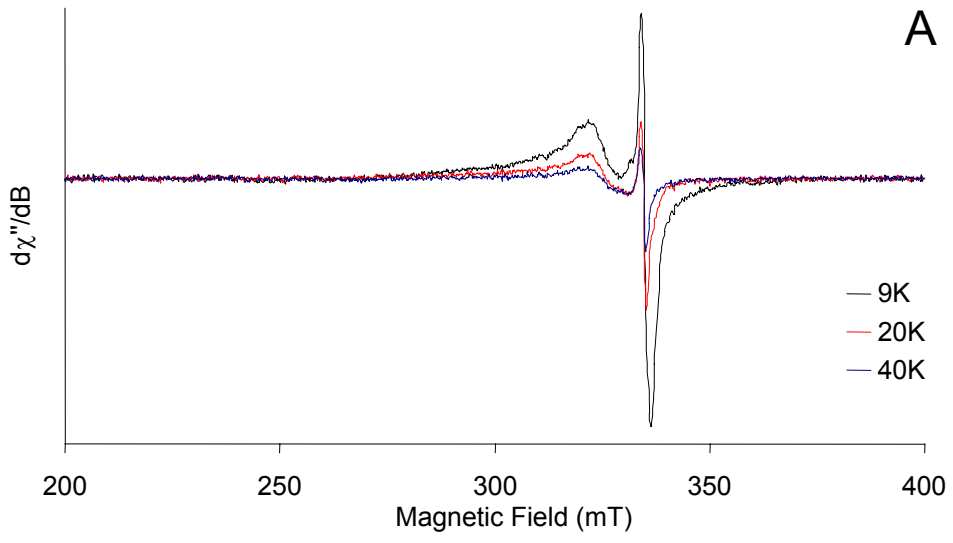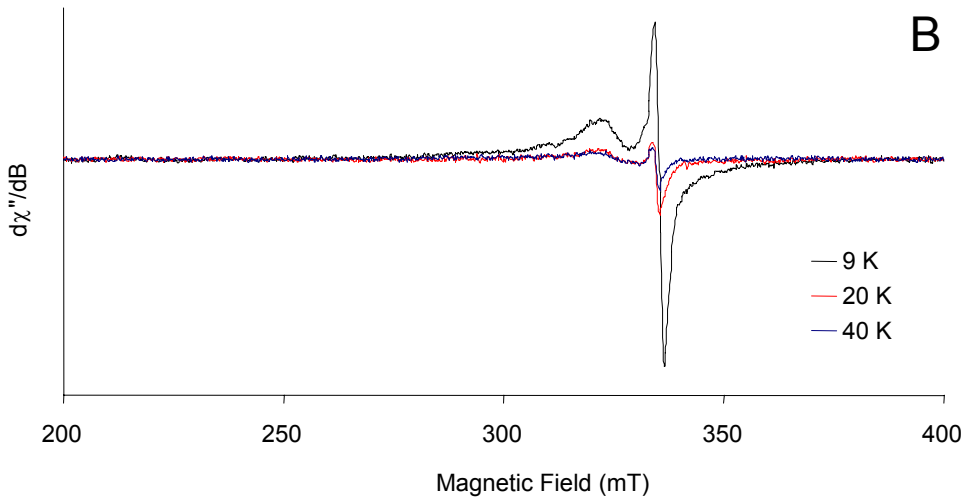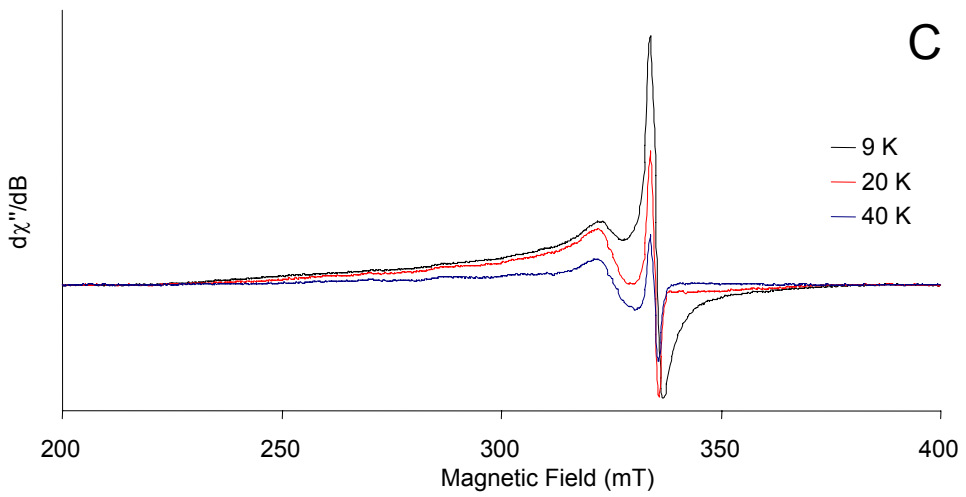

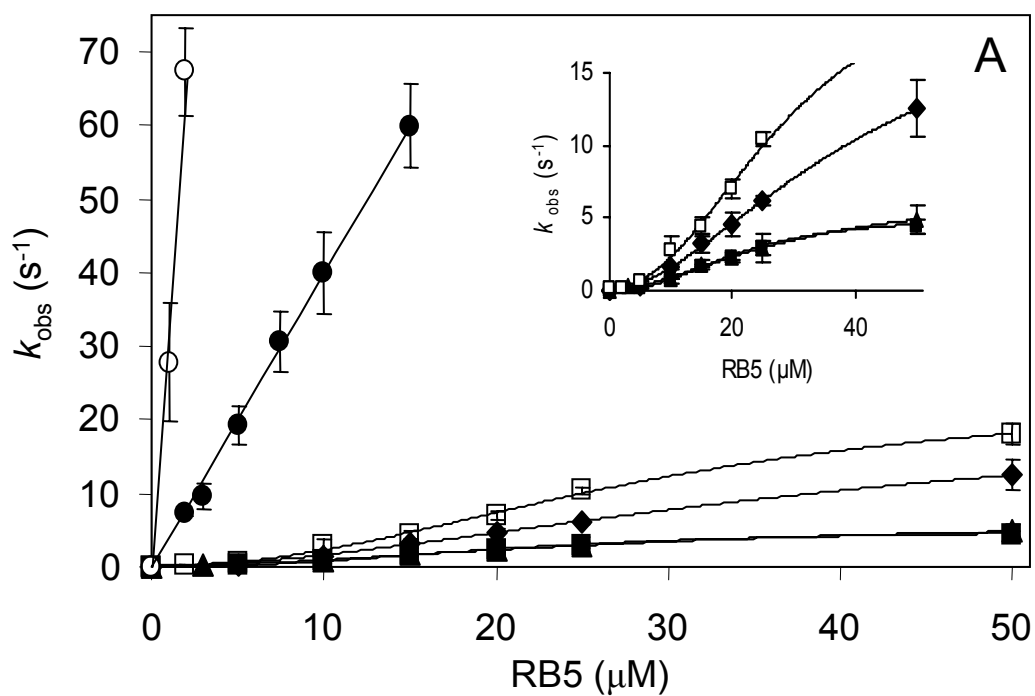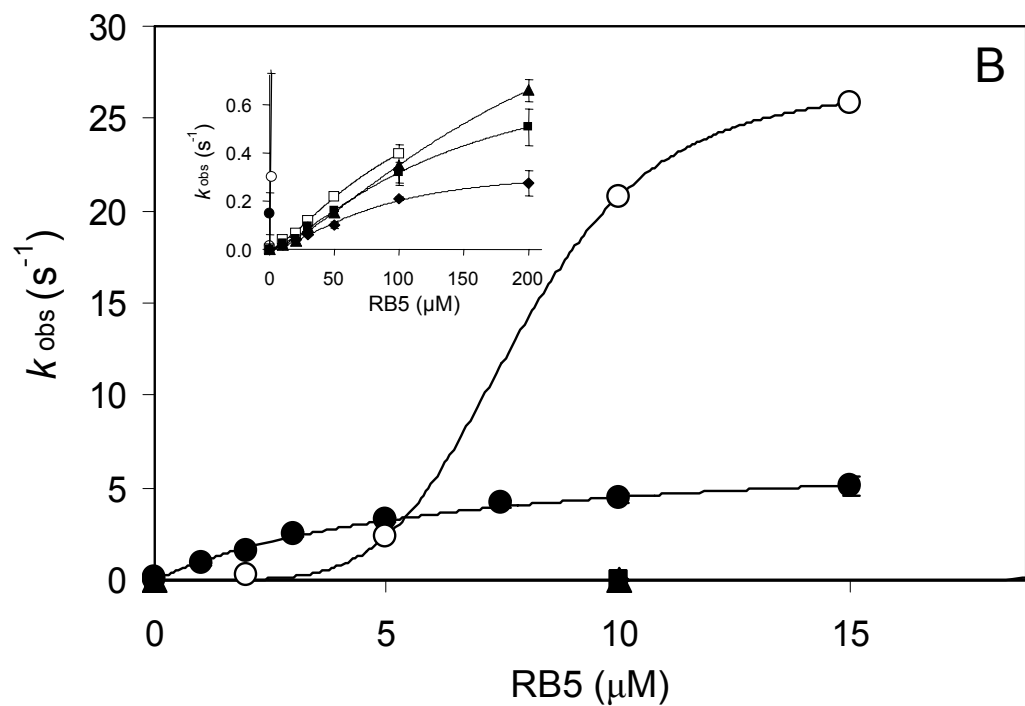

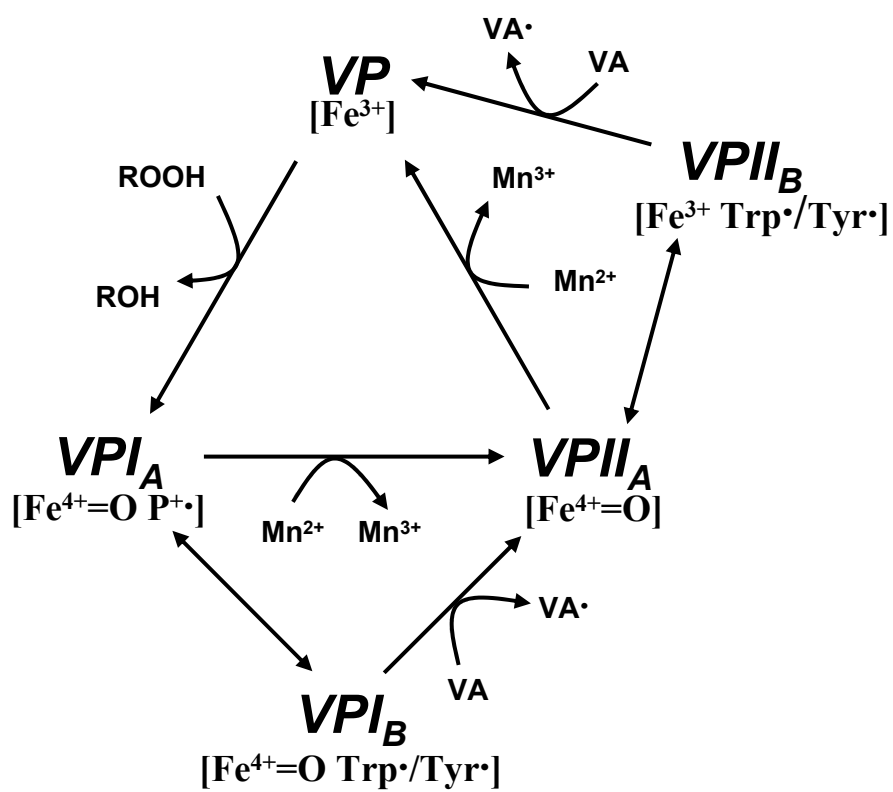

Supplement: M808069200_1.pdf [file M808069200_1.pdf]
